# Supplementary material for: Characterization of a family 43 β-xylosidase from the xylooligosaccharide utilizing putative probiotic Weissella sp. strain 92
Source: PubMed Central journal article supplement — Glycobiology. 2015 Oct 22;26(2):193–202. doi: 10.1093/glycob/cwv092 (PMC4691288; doi:10.1093/glycob/cwv092), 2015-10-22
Supplement: supp_cwv092_cwv092supp.pdf [file supp_cwv092_cwv092supp.pdf]

1 **Supplementary Information**

2 Table S1. Parameters used for the prediction of the three-dimensional structure of WXynB1  
 3 in the YASARA software

| Parameter                                                             | Description |
|-----------------------------------------------------------------------|-------------|
| Modeling speed                                                        | Slow        |
| PSI-BLAST iterations in template search                               | 10          |
| Maximum allowed (PSI-)BLAST E-value to consider template (EValue Max) | 0.5         |
| Maximum number of templates to be used                                | 10          |
| Maximum number of templates with same sequence                        | 1           |
| Maximum oligomerization state                                         | 1 and 4     |
| Maximum number of alignment variations per template                   | 5           |
| Maximum number of conformations tried per loop                        | 50          |
| Maximum number of residues added to the termini                       | 10          |

4

5

6 Table S2. WXynB1 model ranking for the 4 best models generated from a total of 25 for the  
 7 protomer and 45 for the tetramer. In both cases the hybrid models reached the highest hits

| Rank | Protomeric model |              |          | Tetrameric model |              |          |
|------|------------------|--------------|----------|------------------|--------------|----------|
|      | Z-score          | Template     | Residues | Z-score          | Template     | Residues |
| 1    | -1.067           | Hybrid model | 9-571    | -1.394           | Hybrid model | 10-570   |
| 2    | -1.194           | 3C2U         | 19-561   | -1.469           | 1YRZ         | 20-559   |
| 3    | -1.227           | 3C2U         | 20-561   | -1.470           | 1YRZ         | 20-559   |
| 4    | -1.231           | 2EXI         | 20-560   | -1.521           | 2EXJ         | 20-560   |

8

9

10 Table S3. WXynB1 hybrid models composition. The fragments listed below were combined  
 11 from other models

| Protomeric hybrid model |              |        |            |        | Tetrameric hybrid model |              |        |            |        |
|-------------------------|--------------|--------|------------|--------|-------------------------|--------------|--------|------------|--------|
| First residue           | Last residue | Length | From model | Score  | First residue           | Last residue | Length | From model | Score  |
| 10                      | 570          | 561    | 2EXK_D01*  | -1.553 | 10                      | 570          | 561    | 2EXK_02*   | -1.472 |
| 9                       | 22           | 14     | 3C2U_C04   | -1.518 | 10                      | 570          | 561    | 2EXK_02**  | -1.462 |
| 316                     | 336          | 21     | 3C2U_C05   | -1.507 | 456                     | 469          | 14     | 2EXJ_01    | -1.427 |
| 557                     | 571          | 15     | 3C2U_C02   | -1.472 | 369                     | 376          | 8      | 1YIF_02    | -1.418 |
| 43                      | 58           | 16     | 2EXI_B03   | -1.462 | 332                     | 335          | 4      | 1YI7_02    | -1.415 |
|                         |              |        |            |        | 490                     | 493          | 4      | 1YRZ_A05   | -1.412 |
|                         |              |        |            |        | 490                     | 493          | 4      | 1YRZ_A05   | -1.407 |
|                         |              |        |            |        | 279                     | 282          | 4      | 1YRZ_A05   | -1.405 |

12 \* Model considered most suitable for hybridization

13 \*\* Model oligomerized

14

15

16 Table S4. Gel filtration results for WXynB1 and the truncated catalytic domain

|                                   | Peak 1 | 2    | 3    |
|-----------------------------------|--------|------|------|
| <i>WXynB1</i>                     |        |      |      |
| V/V0                              | 1.34   |      |      |
| Mw (kDa)                          | 259    |      |      |
| Estimated number of subunits      | 4      |      |      |
| <i>Truncated catalytic domain</i> |        |      |      |
| V/V0                              | 1.81   | 1.60 | 1.46 |
| Mw (kDa)                          | 43     | 95   | 163  |
| Estimated number of subunits      | 1      | 2-3  | 4    |
| Distribution (%)                  | 35     | 32   | 33   |

17

18

**Table S5.** Prediction of inter-molecular hydrogen bonds based on the model of the tetramer of WXyn43.

Residues with distances relevant for hydrogen bond formation are shown.

| Donor Atom                             | Chain | Acceptor Atom           | Chain | Donor-Acceptor Distance (Å) | Donor-H-Acceptor Distance (Å) |
|----------------------------------------|-------|-------------------------|-------|-----------------------------|-------------------------------|
| <i>Dimer-forming hydrogen bonds</i>    |       |                         |       |                             |                               |
| Arg 120 N <sup>η1</sup>                | A     | Asp 529 O <sup>δ1</sup> | D     | 3.0                         | 2.2                           |
| Arg 120 N <sup>η1</sup>                | A     | Asp 529 O <sup>δ2</sup> | D     | 3.3                         | 2.4                           |
| Arg 120 N <sup>η2</sup>                | A     | Asp 529 O <sup>δ1</sup> | D     | 3.0                         | 2.2                           |
| Arg 120 N <sup>η2</sup>                | A     | Asp 529 O <sup>δ2</sup> | D     | 3.0                         | 2.1                           |
| Gly 123 N                              | A     | Ser 526 O               | D     | 2.9                         | 1.9                           |
| Arg 148 N <sup>η1</sup>                | A     | Asp 428 O <sup>δ2</sup> | D     | 2.9                         | 2.0                           |
| Arg 148 N <sup>η2</sup>                | A     | Lys 426 O               | D     | 3.1                         | 2.3                           |
| Arg 148 N <sup>η2</sup>                | A     | Asp 428 O <sup>δ2</sup> | D     | 3.1                         | 2.2                           |
| Tyr 150 O <sup>η</sup>                 | A     | Glu 435 O <sup>ε2</sup> | D     | 2.7                         | 1.7                           |
| Thr 173 O <sup>γ1</sup>                | A     | Tyr 528 O <sup>η</sup>  | D     | 2.8                         | 1.9                           |
| Ser 372 N                              | A     | Asp 100 O <sup>δ2</sup> | D     | 2.8                         | 1.8                           |
| Ser 372 O <sup>γ</sup>                 | A     | Asp 100 O <sup>δ1</sup> | D     | 2.7                         | 1.8                           |
| Asn 375 N <sup>δ2</sup>                | A     | Asp 100 O <sup>δ2</sup> | D     | 3.0                         | 2.0                           |
| Tyr 404 O <sup>η</sup>                 | A     | Trp 145 O               | D     | 2.8                         | 1.8                           |
| Gln 405 N <sup>ε2</sup>                | A     | Val 124 O               | D     | 2.8                         | 1.9                           |
| Gln 405 N <sup>ε2</sup>                | A     | Trp 145 O               | D     | 3.2                         | 2.3                           |
| Arg 444 N <sup>ε</sup>                 | A     | Ser 508 O               | D     | 2.9                         | 1.9                           |
| Arg 444 N <sup>η1</sup>                | A     | Gln 507 O               | D     | 3.1                         | 2.4                           |
| Gly 446 N                              | A     | Asp 95 O                | D     | 2.9                         | 1.9                           |
| Ser 450 N                              | A     | Glu 149 O <sup>ε1</sup> | D     | 2.9                         | 1.9                           |
| Lys 453 N <sup>ζ</sup>                 | A     | Glu 149 O <sup>ε1</sup> | D     | 3.0                         | 2.1                           |
| Tyr 525 O <sup>η</sup>                 | A     | Lys 99 O                | D     | 2.8                         | 1.8                           |
| Tyr 525 O <sup>η</sup>                 | A     | Thr 173 O <sup>γ1</sup> | D     | 2.9                         | 1.9                           |
| <i>Tetramer-forming hydrogen bonds</i> |       |                         |       |                             |                               |
| His 152 N <sup>δ1</sup>                | C     | Glu 276 O <sup>ε1</sup> | A     | 2.9                         | 1.9                           |
| Tyr 242 O <sup>η</sup>                 | C     | Asp 182 O <sup>δ2</sup> | A     | 2.7                         | 1.8                           |
| Ser 277 O <sup>γ</sup>                 | C     | Val 183 O               | A     | 2.7                         | 1.7                           |
| Ser 278 N                              | C     | Asp 182 O               | A     | 3.0                         | 2.1                           |
| Ser 278 O <sup>γ</sup>                 | C     | Asp 182 O <sup>δ2</sup> | A     | 2.7                         | 1.7                           |
| His 152 N <sup>δ1</sup>                | C     | Glu 276 O <sup>ε1</sup> | A     | 2.9                         | 1.9                           |

20 Figure S1. Molecular weight determination of *WXynB1* by gel filtration. Red data point  
21 indicates the position of *WXynB1* on the standard curve (blue data points) and green points  
22 represents the data for the truncated catalytic domain.

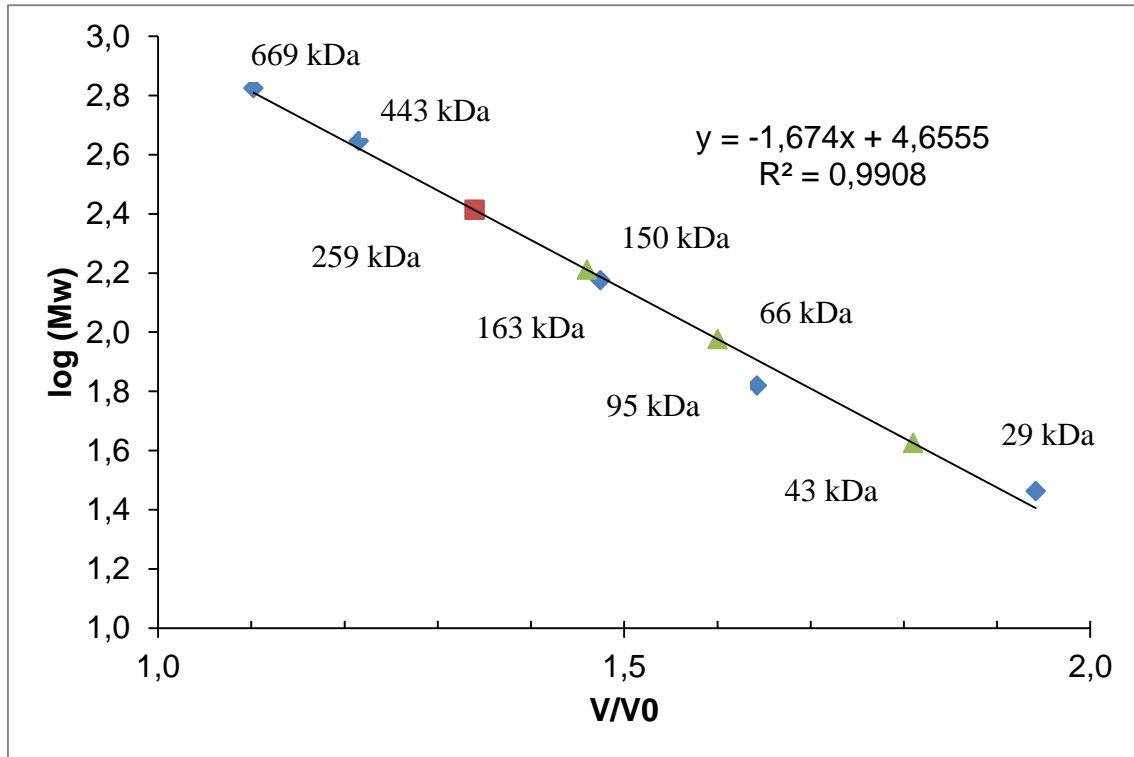

23

24

25
